# Supplementary material for: Further Evidence of the Role of myomiRs miR-133a, -133b and -206 Dysregulation in Cardiovascular Disease Development
Source: Preprints.org preprint supplement (doi:10.20944/preprints202409.1614.v1), 2024-09-20
Supplement: Supplementary file 1 [file supplementary]

## Sheet: Sheet1
Gene Symbol	p-value	FDR	Odd ratio	Number of interactions	microRNA 1	microRNA 2	microRNA 3
ACTL6A	0.00461	0.0171	0.00462	1	hsa-miR-206
AFTPH	0.0104	0.0282	0.0104	1	hsa-miR-133a-3p
AKT1	0.00211	0.0109	0.0404	2	hsa-miR-133b	hsa-miR-206
ALDOC	0.0218	0.0456	0.0219	1	hsa-miR-133a-3p
ANGEL2	0.000794	0.00607	0.0248	2	hsa-miR-133a-3p	hsa-miR-133b
ANGPT4	0.00268	0.0123	0.0456	2	hsa-miR-133b	hsa-miR-133a-3p
ANXA2	1.86e-05	0.00168	0.00404	2	hsa-miR-133a-3p	hsa-miR-206
ARPC5	0.0138	0.0336	0.0139	1	hsa-miR-133a-3p
ATP13A3	0.000686	0.00579	0.0231	2	hsa-miR-133b	hsa-miR-133a-3p
ATP5E	0.0104	0.0282	0.0104	1	hsa-miR-206
BCAN	0.0172	0.0397	0.0173	1	hsa-miR-133a-3p
BCL2L1	0.0101	0.0282	0.0889	2	hsa-miR-133a-3p	hsa-miR-133b
BDNF	0.0172	0.0397	0.0173	1	hsa-miR-206
C11orf24	0.000586	0.00566	0.0214	2	hsa-miR-133b	hsa-miR-133a-3p
C17orf64	0.00012	0.0025	0.00981	2	hsa-miR-133b	hsa-miR-133a-3p
CASP9	0.00806	0.0247	0.00808	1	hsa-miR-133a-3p
CCDC39	0.000204	0.00341	0.0127	2	hsa-miR-133b	hsa-miR-133a-3p
CCL2	0.0115	0.0302	0.0115	1	hsa-miR-206
CCNI	5.85e-05	0.00226	0.00693	2	hsa-miR-133b	hsa-miR-133a-3p
CDC42	0.000265	0.00341	0.0144	2	hsa-miR-133a-3p	hsa-miR-133b
CDK13	0.0206	0.0442	0.0208	1	hsa-miR-133b
CDK5R1	0.000265	0.00341	0.0144	2	hsa-miR-133a-3p	hsa-miR-133b
CERS2	0.00229	0.0109	0.0421	2	hsa-miR-133a-3p	hsa-miR-206
CHMP3	0.000832	0.00607	0.0254	2	hsa-miR-133b	hsa-miR-133a-3p
CMTM4	0.0014	0.00803	0.0329	2	hsa-miR-133b	hsa-miR-133a-3p
CNN2	0.000106	0.0025	0.00923	2	hsa-miR-133a-3p	hsa-miR-133b
CPNE3	0.00806	0.0247	0.00808	1	hsa-miR-133b
CTGF	0.000384	0.00451	0.0173	2	hsa-miR-133b	hsa-miR-133a-3p
CXCR4	0.0184	0.041	0.0185	1	hsa-miR-133b
DCAKD	0.000494	0.00513	0.0196	2	hsa-miR-133b	hsa-miR-133a-3p
DLK1	0.0138	0.0336	0.0139	1	hsa-miR-206
EGFL7	0.00346	0.0146	0.00346	1	hsa-miR-133a-3p
EGFR	0.000686	0.00579	0.0231	2	hsa-miR-133a-3p	hsa-miR-133b
EMID1	0.000186	0.00334	0.0121	2	hsa-miR-133b	hsa-miR-133a-3p
ERG	0.00576	0.0202	0.00577	1	hsa-miR-133b
FAIM	0.00461	0.0171	0.00462	1	hsa-miR-133b
FAM120C	0.00231	0.0109	0.00231	1	hsa-miR-133a-3p
FAM160B1	0.00187	0.0103	0.0381	2	hsa-miR-133a-3p	hsa-miR-133b
FAM213B	0.0161	0.0384	0.0162	1	hsa-miR-133a-3p
FAS	0.0184	0.041	0.0185	1	hsa-miR-133b
FBN1	0.0126	0.0319	0.0127	1	hsa-miR-133a-3p
FOSL2	0.00379	0.0158	0.0543	2	hsa-miR-133a-3p	hsa-miR-133b
Foxl2	0.00115	0.00708	0.00115	1	hsa-miR-133a-3p
FOXL2	0.0126	0.0319	0.0127	1	hsa-miR-133b
FSCN1	0.0042	0.0169	0.0571	2	hsa-miR-133a-3p	hsa-miR-133b
FTL	0.00231	0.0109	0.00231	1	hsa-miR-133a-3p
FYB1	0.0126	0.0319	0.0127	1	hsa-miR-206
GJA1	0.0241	0.0478	0.0242	1	hsa-miR-206
GLI1	0.00691	0.0228	0.00693	1	hsa-miR-133b
GLI3	0.00806	0.0247	0.00808	1	hsa-miR-133b
GPD2	0.00691	0.0228	0.00693	1	hsa-miR-206
GSTP1	8.88e-06	0.00168	0.00289	2	hsa-miR-133a-3p	hsa-miR-133b
HAPLN1	0.000135	0.00261	0.0104	2	hsa-miR-133a-3p	hsa-miR-133b
HCN2	0.000224	0.00341	0.0133	2	hsa-miR-133a-3p	hsa-miR-133b
HCN4	8.06e-05	0.00242	0.00808	2	hsa-miR-133a-3p	hsa-miR-133b
HDAC4	0.0229	0.0469	0.0231	1	hsa-miR-206
HIST2H2AC	0.000265	0.00341	0.0144	2	hsa-miR-133b	hsa-miR-133a-3p
IGF1R	0.000828	0.00607	0.0943	3	hsa-miR-133b	hsa-miR-133a-3p	hsa-miR-206
ITPKB	0.000757	0.00607	0.0242	2	hsa-miR-133b	hsa-miR-133a-3p
KCNH2	0.00103	0.00697	0.0283	2	hsa-miR-133a-3p	hsa-miR-133b
KCNQ1	0.00115	0.00708	0.00115	1	hsa-miR-133a-3p
KPNA6	0.00575	0.0202	0.0669	2	hsa-miR-133a-3p	hsa-miR-133b
KRT7	0.00806	0.0247	0.00808	1	hsa-miR-133a-3p
LDLRAP1	0.00576	0.0202	0.00577	1	hsa-miR-133a-3p
MC2R	0.0015	0.00843	0.0341	2	hsa-miR-133b	hsa-miR-133a-3p
MCL1	0.0042	0.0169	0.0571	2	hsa-miR-133b	hsa-miR-133a-3p
MEG3	0.00921	0.027	0.00923	1	hsa-miR-133a-3p
MET	0.000794	0.00607	0.0248	2	hsa-miR-206	hsa-miR-133b
MMP14	4.88e-05	0.00226	0.00635	2	hsa-miR-133a-3p	hsa-miR-133b
MMP9	0.0241	0.0478	0.0242	1	hsa-miR-133b
MYEF2	0.0184	0.041	0.0185	1	hsa-miR-206
MYPN	0.00918	0.027	0.0848	2	hsa-miR-133b	hsa-miR-133a-3p
NCDN	0.0206	0.0442	0.0208	1	hsa-miR-133a-3p
NOTCH3	0.0104	0.0282	0.0104	1	hsa-miR-206
NR1H3	0.00346	0.0146	0.00346	1	hsa-miR-206
NR4A2	0.000106	0.0025	0.00923	2	hsa-miR-133a-3p	hsa-miR-206
NRP1	0.0172	0.0397	0.0173	1	hsa-miR-206
NT5C1B	0.0218	0.0456	0.0219	1	hsa-miR-206
NT5C1B-RDH14	0.0195	0.0428	0.0196	1	hsa-miR-206
NUP214	0.0206	0.0442	0.0208	1	hsa-miR-133b
OTX2	0.00231	0.0109	0.00231	1	hsa-miR-206
PAX3	0.0241	0.0478	0.0242	1	hsa-miR-206
PDE1A	4.88e-05	0.00226	0.00635	2	hsa-miR-133b	hsa-miR-133a-3p
PGD	0.0252	0.0489	0.0254	1	hsa-miR-206
PIAS2	0.00103	0.00697	0.0283	2	hsa-miR-133a-3p	hsa-miR-133b
PITX3	0.0115	0.0302	0.0115	1	hsa-miR-133b
PKM	0.0108	0.029	0.0923	2	hsa-miR-133b	hsa-miR-133a-3p
PNP	0.0172	0.0397	0.0173	1	hsa-miR-133a-3p
POU2F2	0.00103	0.00697	0.0283	2	hsa-miR-133a-3p	hsa-miR-133b
PPP2R2D	0.00231	0.0109	0.00231	1	hsa-miR-133b
PRDM16	1.86e-05	0.00168	0.00404	2	hsa-miR-133b	hsa-miR-133a-3p
PSMA7	0.0218	0.0456	0.0219	1	hsa-miR-206
PTMA	0.000114	0.0025	0.0489	3	hsa-miR-206	hsa-miR-133a-3p	hsa-miR-133b
PTPRK	0.0138	0.0336	0.0139	1	hsa-miR-133b
RAB5C	5.53e-05	0.00226	0.0385	3	hsa-miR-206	hsa-miR-133a-3p	hsa-miR-133b
RB1CC1	0.00806	0.0247	0.00808	1	hsa-miR-133b
RBMXL1	0.000619	0.00576	0.0219	2	hsa-miR-133b	hsa-miR-133a-3p
RGS3	0.00461	0.0171	0.00462	1	hsa-miR-133a-3p
RHOQ	0.000265	0.00341	0.0144	2	hsa-miR-133b	hsa-miR-133a-3p
RMRP	0.00115	0.00708	0.00115	1	hsa-miR-206
RNF103-CHMP3	0.000586	0.00566	0.0214	2	hsa-miR-133b	hsa-miR-133a-3p
RNF168	0.000358	0.0044	0.0167	2	hsa-miR-133b	hsa-miR-133a-3p
SEC61B	0.00231	0.0109	0.00231	1	hsa-miR-133a-3p
SEPT6	0.000494	0.00513	0.0196	2	hsa-miR-133a-3p	hsa-miR-133b
SERPINH1	0.00255	0.0119	0.0444	2	hsa-miR-133b	hsa-miR-133a-3p
SESN3	0.00677	0.0228	0.0727	2	hsa-miR-133a-3p	hsa-miR-133b
SMARCB1	0.00921	0.027	0.00923	1	hsa-miR-206
SMKR1	0.0138	0.0336	0.0139	1	hsa-miR-206
SNX30	0.00231	0.0109	0.00231	1	hsa-miR-133a-3p
SNX33	0.00806	0.0247	0.00808	1	hsa-miR-133a-3p
SOD1	0.00461	0.0171	0.00462	1	hsa-miR-206
SP1	0.00858	0.026	0.082	2	hsa-miR-133a-3p	hsa-miR-133b
STK3	0.00691	0.0228	0.00693	1	hsa-miR-133b
STX12	0.0252	0.0489	0.0254	1	hsa-miR-206
SUPT16H	0.00121	0.00725	0.0306	2	hsa-miR-133a-3p	hsa-miR-133b
SYAP1	0.00303	0.0136	0.0485	2	hsa-miR-133a-3p	hsa-miR-133b
TAC1	0.00461	0.0171	0.00462	1	hsa-miR-206
TAGLN2	0.0014	0.00803	0.0329	2	hsa-miR-133a-3p	hsa-miR-133b
TBX3	0.00576	0.0202	0.00577	1	hsa-miR-206
TCTEX1D2	0.00115	0.00708	0.00115	1	hsa-miR-133a-3p
TKT	0.0104	0.0282	0.0104	1	hsa-miR-206
TPM1	0.0241	0.0478	0.0242	1	hsa-miR-133a-3p
TPM3	0.0118	0.0306	0.0964	2	hsa-miR-133a-3p	hsa-miR-133b
TRIM71	0.00463	0.0171	0.06	2	hsa-miR-133b	hsa-miR-133a-3p
TXNRD3NB	0.000494	0.00513	0.0196	2	hsa-miR-133b	hsa-miR-133a-3p
UBA2	0.0184	0.041	0.0185	1	hsa-miR-133a-3p
UCP2	0.0229	0.0469	0.0231	1	hsa-miR-133a-3p
UGT2B10	0.0104	0.0282	0.0104	1	hsa-miR-133a-3p
UTRN	0.0229	0.0469	0.0231	1	hsa-miR-206
VAMP2	0.00346	0.0146	0.00346	1	hsa-miR-206
VEGFA	0.00677	0.0228	0.0727	2	hsa-miR-133a-3p	hsa-miR-206
VKORC1	0.0149	0.036	0.015	1	hsa-miR-133a-3p
VSTM5	0.0252	0.0489	0.0254	1	hsa-miR-206
ZBTB37	0.0104	0.0282	0.0906	2	hsa-miR-133b	hsa-miR-133a-3p
ZFP28	6.91e-05	0.00233	0.0075	2	hsa-miR-133b	hsa-miR-133a-3p
ZMAT4	0.000652	0.00579	0.0225	2	hsa-miR-133b	hsa-miR-133a-3p
ZNF215	0.0195	0.0428	0.0196	1	hsa-miR-206
ZNF704	0.00318	0.0141	0.0496	2	hsa-miR-133a-3p	hsa-miR-133b
ZNF79	0.0104	0.0282	0.0104	1	hsa-miR-206
